# Supplementary material
Source: PubMed Central journal article supplement (PMC5001146)
Supplement: DC150931SupplementaryData.pdf [file DC150931SupplementaryData.pdf]

SUPPLEMENTARY DATA

Supplementary Figure 1.1

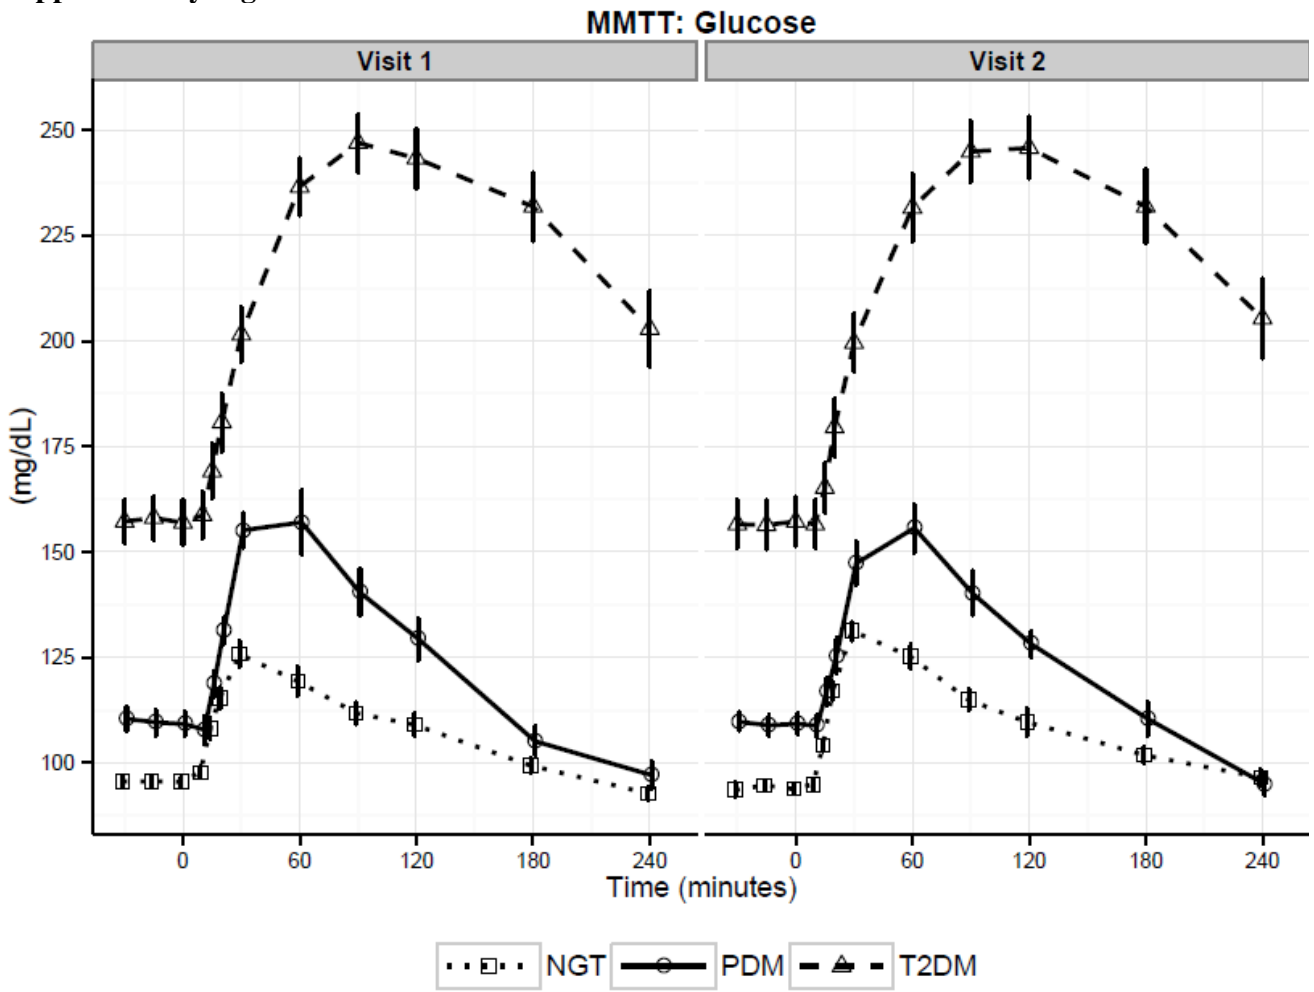

SUPPLEMENTARY DATA

Supplementary Figure 1.2

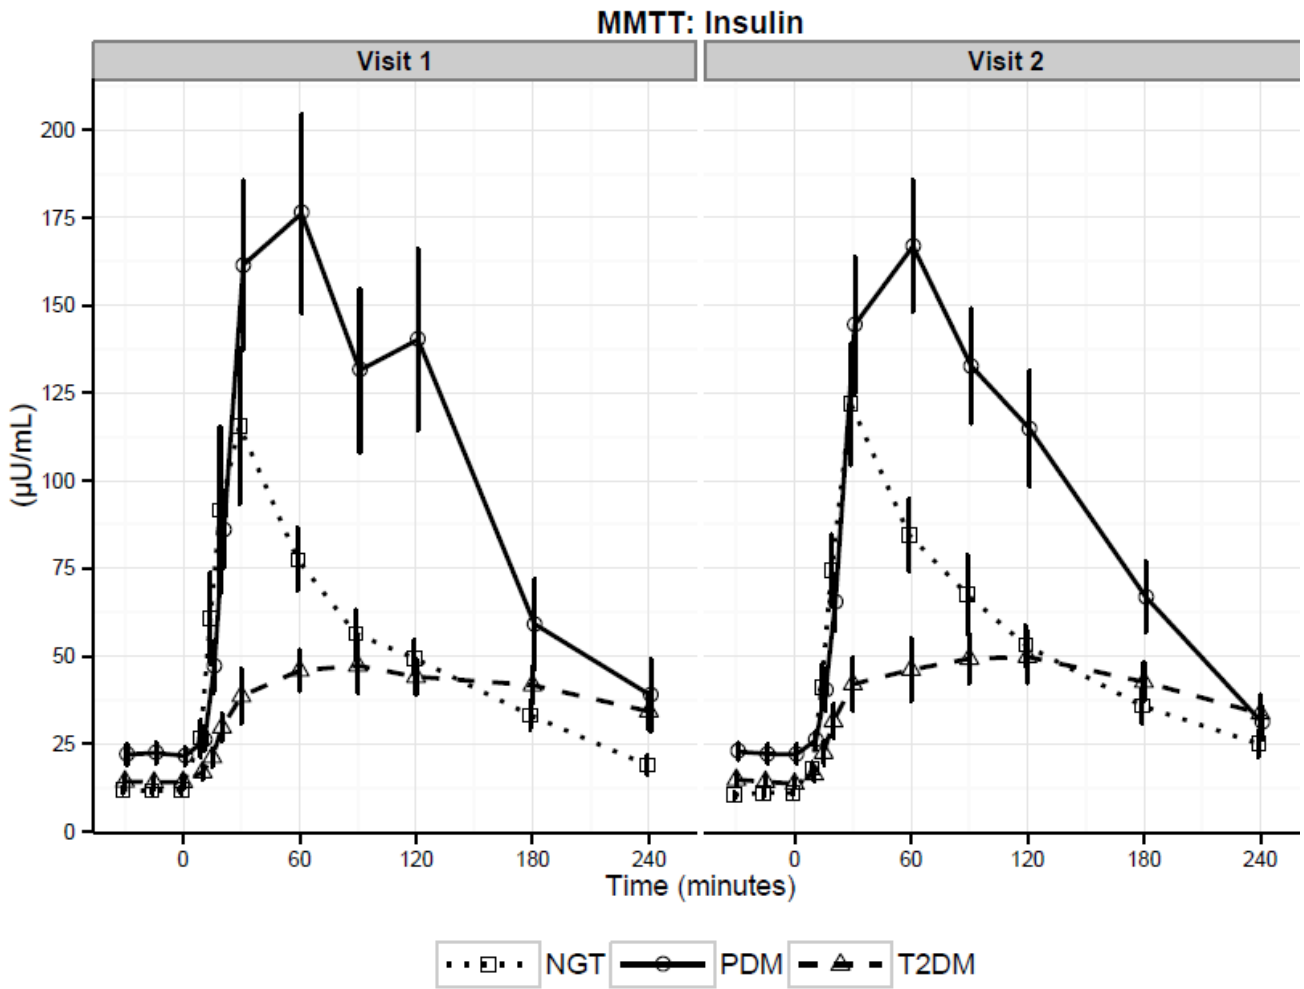

SUPPLEMENTARY DATA

Supplementary Figure 1.3

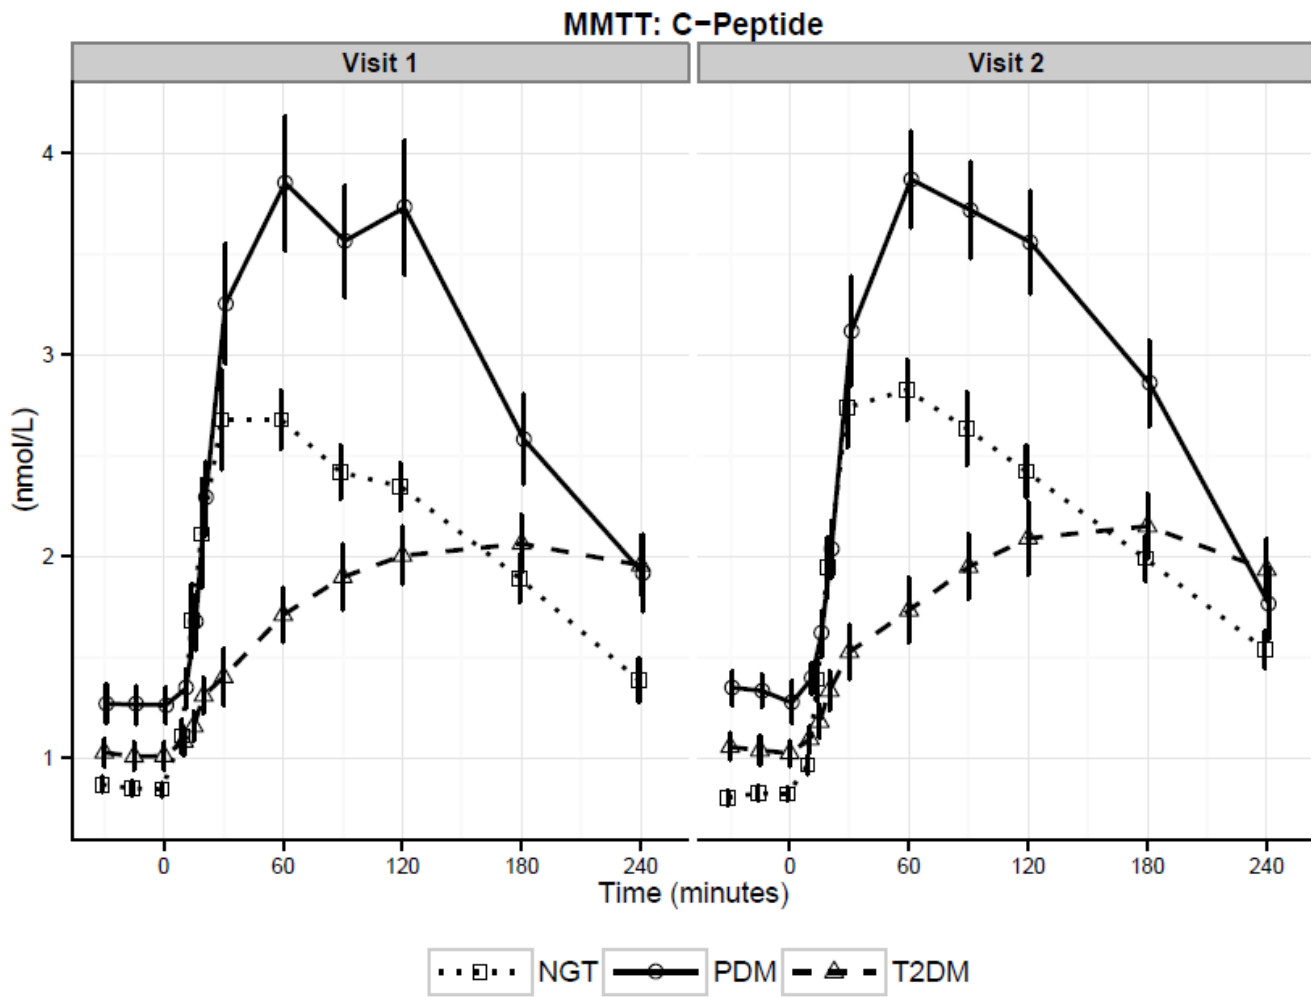

SUPPLEMENTARY DATA

Supplementary Figure 1.4

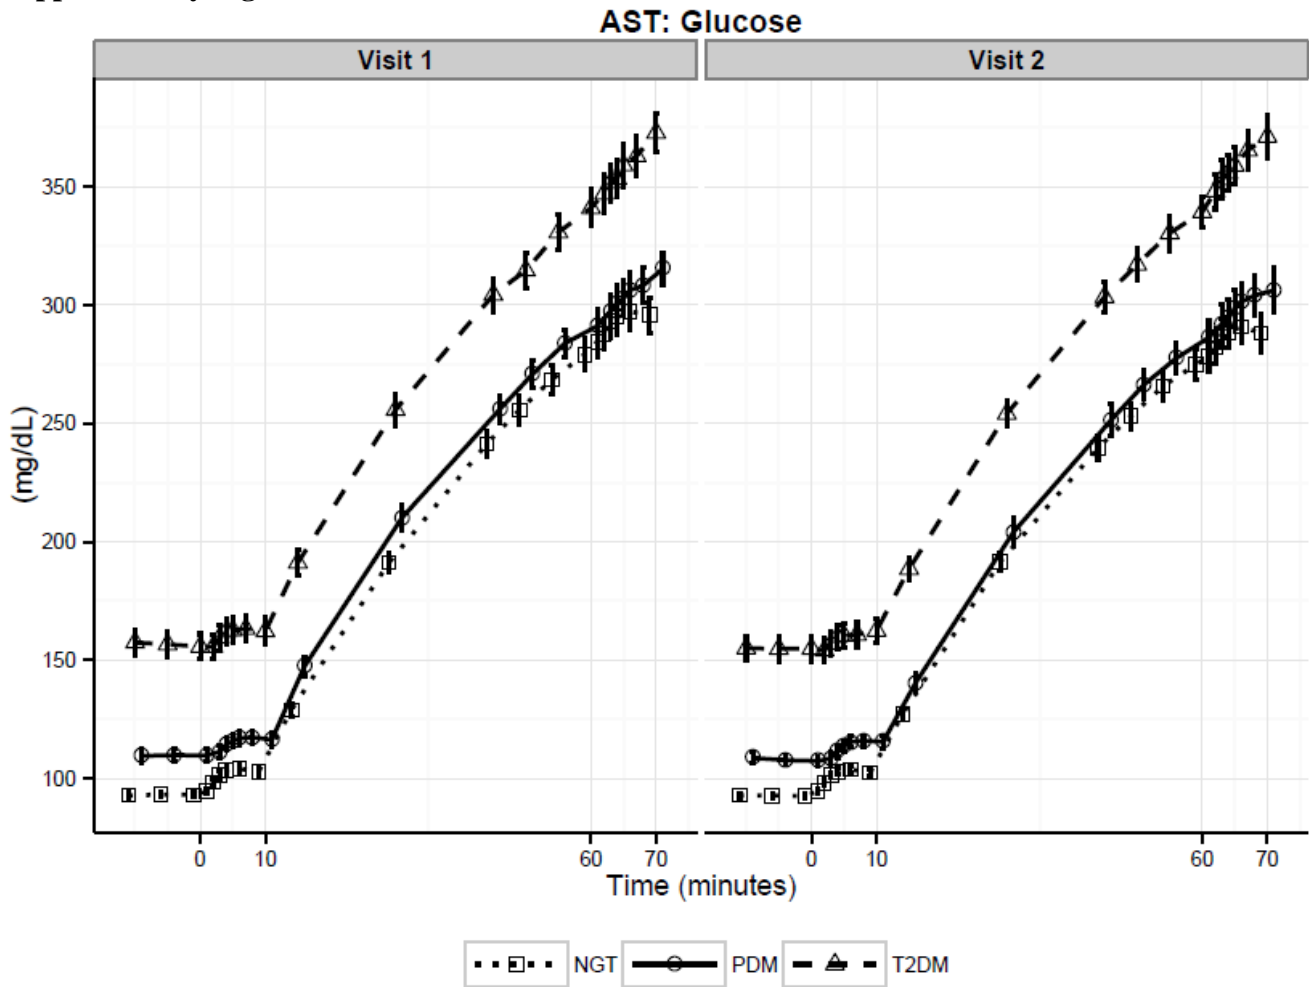

SUPPLEMENTARY DATA

Supplementary Figure 1.5

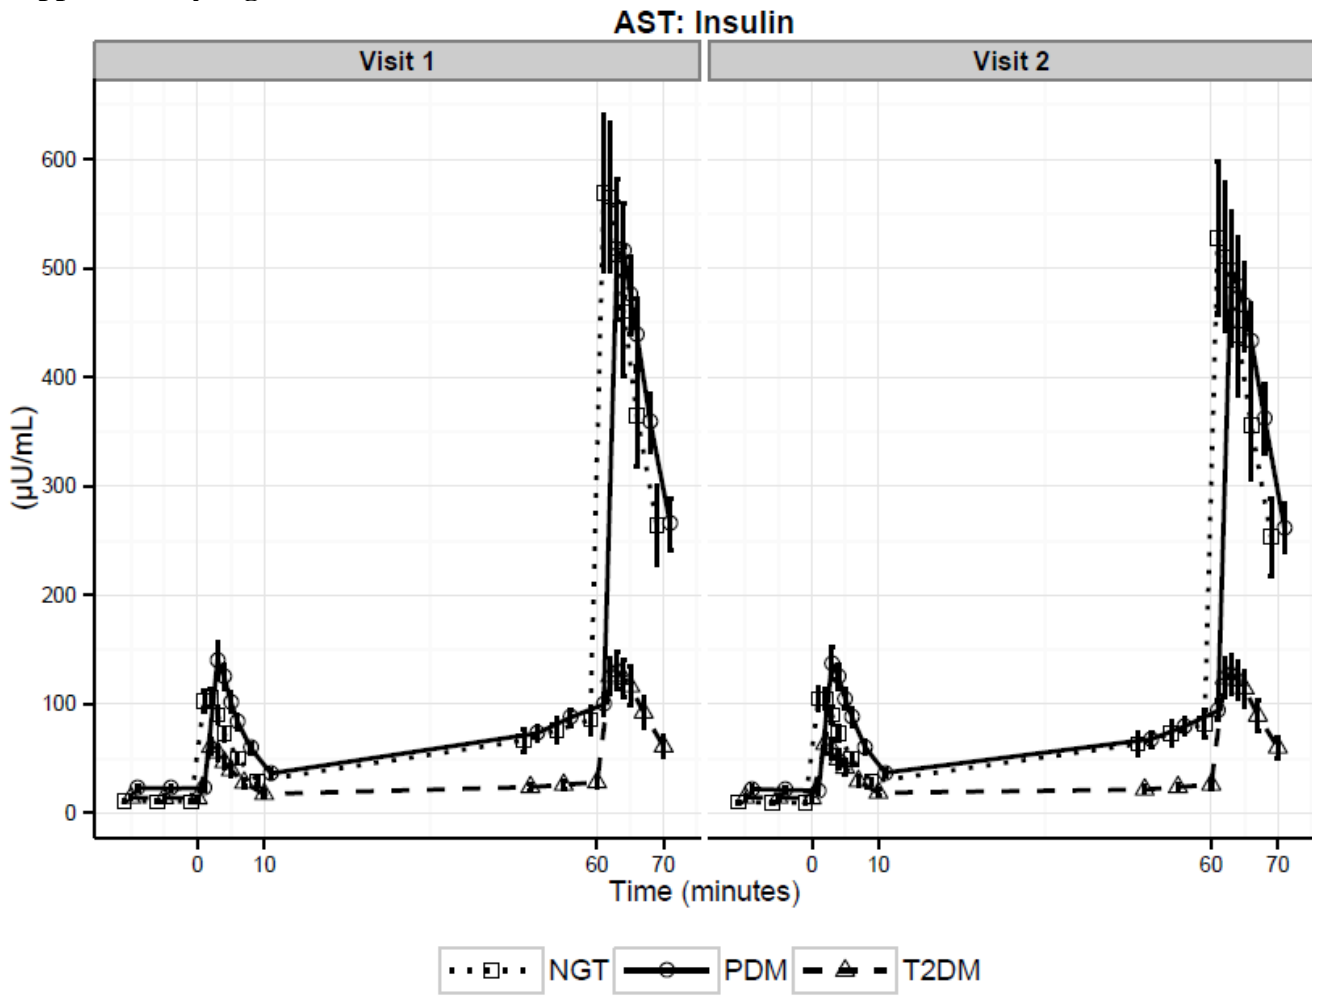

SUPPLEMENTARY DATA

Supplementary Figure 1.6

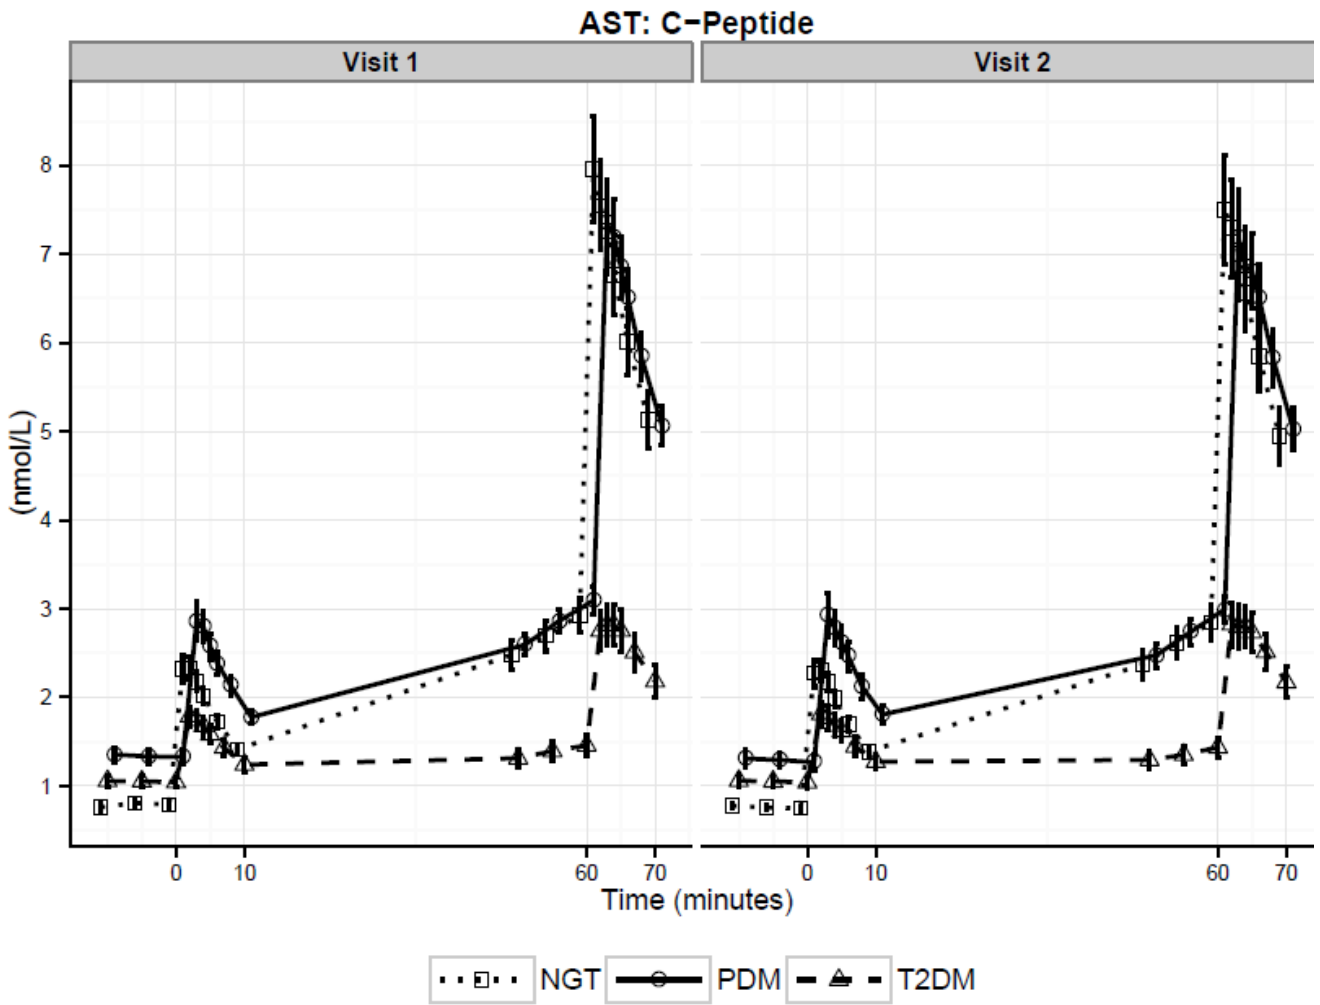

SUPPLEMENTARY DATA

Supplementary Figure 1.7

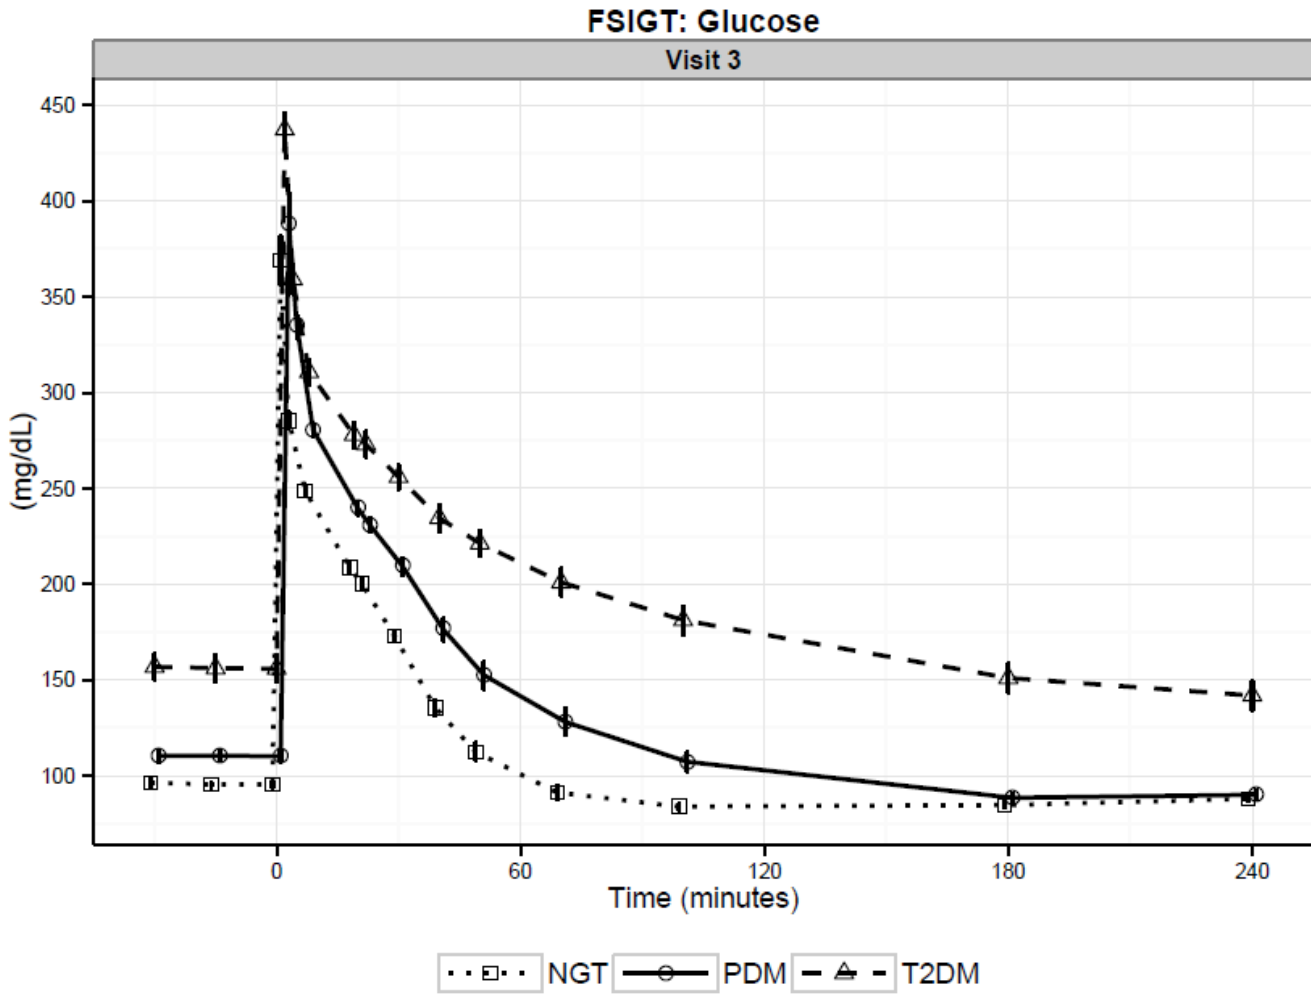

SUPPLEMENTARY DATA

Supplementary Figure 1.8

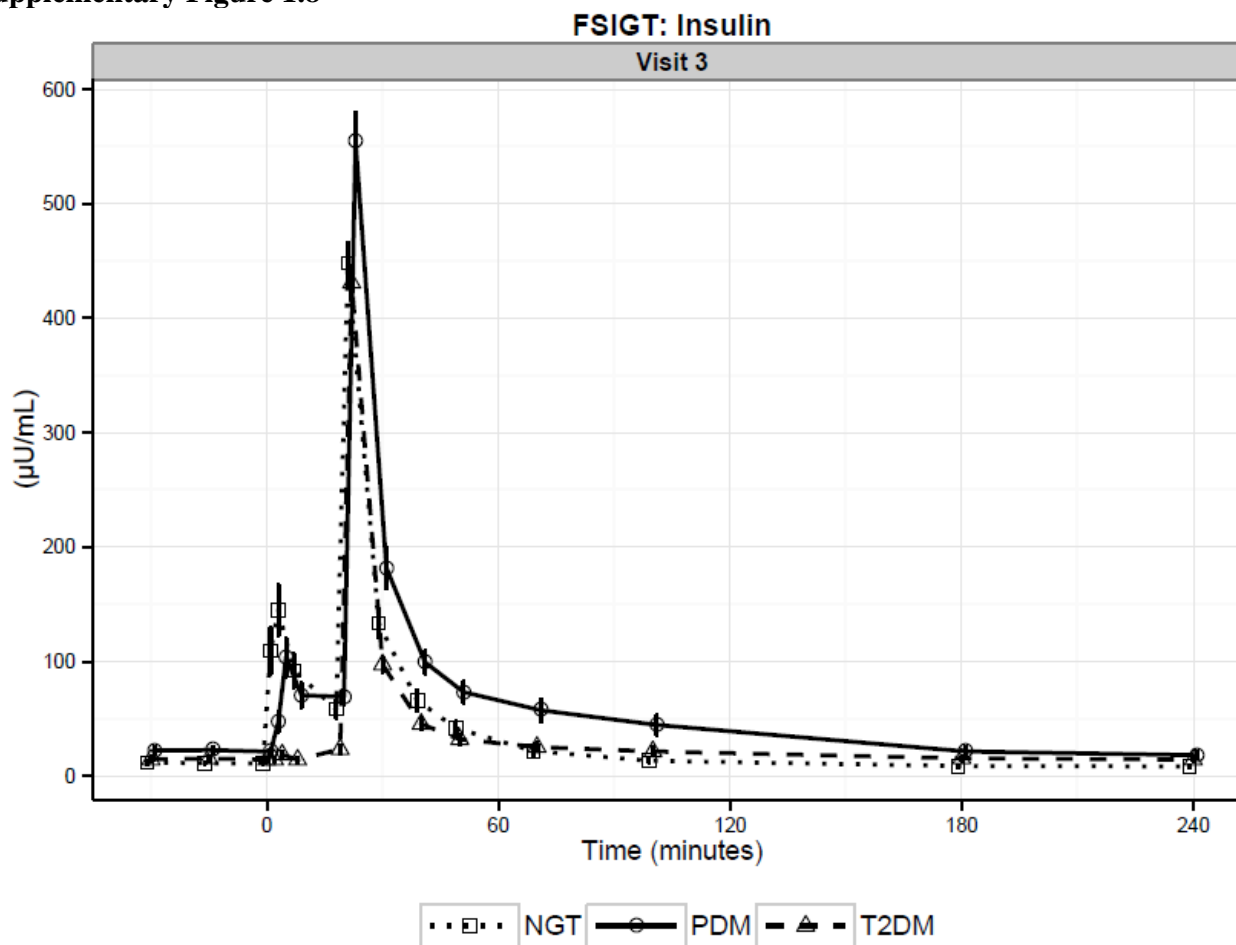



SUPPLEMENTARY DATA

Supplementary Figure 1.9

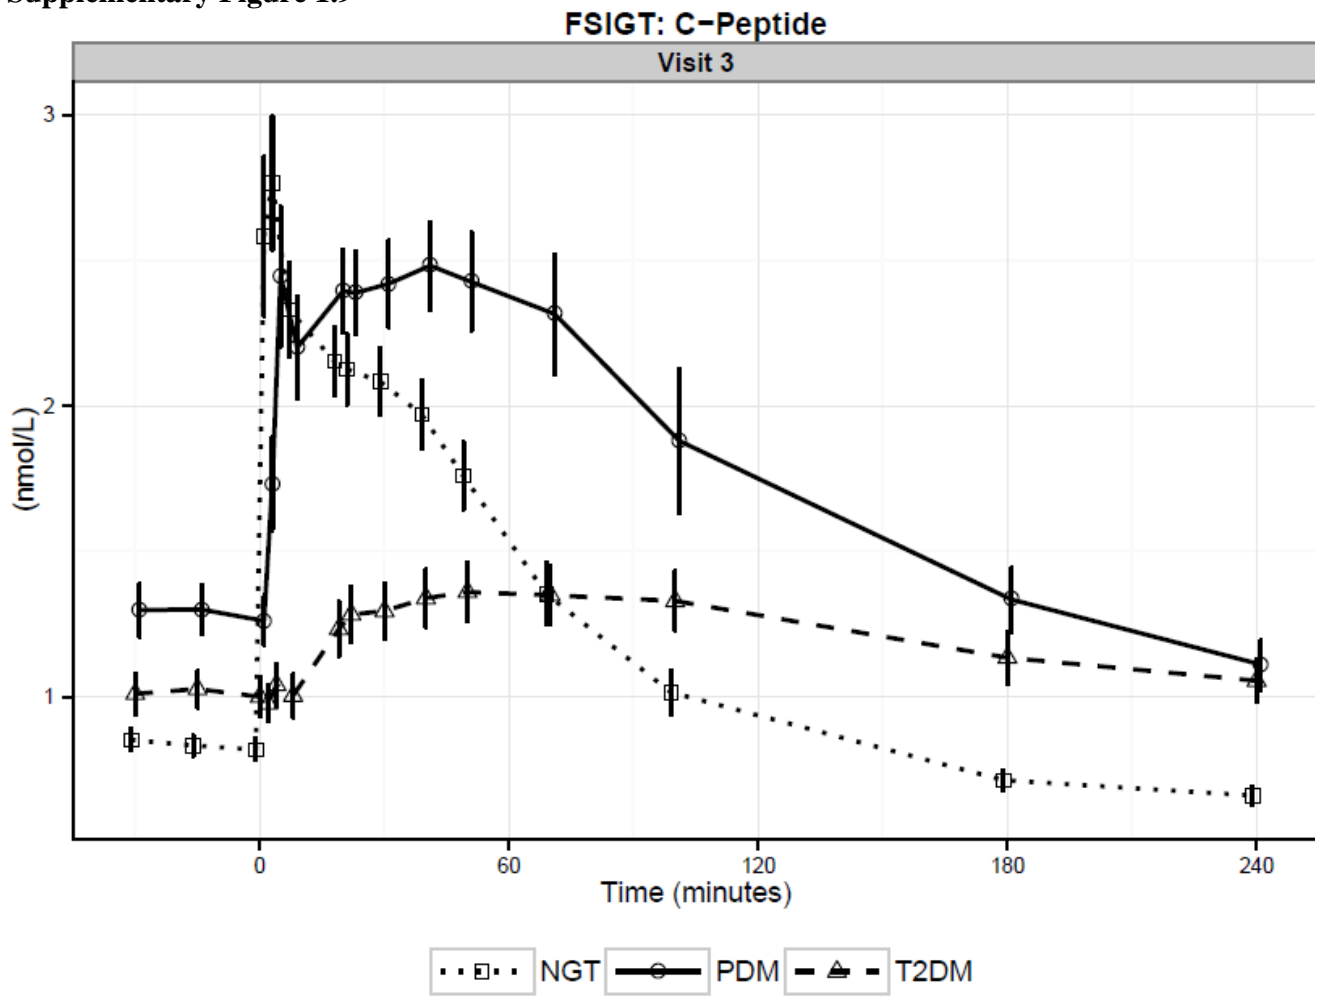

SUPPLEMENTARY DATA

**Supplementary Table 1.1.** Procedure-Emergent Adverse Event Incidence, by Population and Test

|                                            | Population             | AST             | MMTT            | FSIGT         |
|--------------------------------------------|------------------------|-----------------|-----------------|---------------|
| <b>Any PEAE</b>                            | NGT                    | 21 (87.5%) [85] | 1 (4.0%) [3]    | 0             |
|                                            | PDM                    | 15 (88.2%) [51] | 8 (47.1%) [11]  | 3 (18.8%) [6] |
|                                            | T2DM                   | 14 (63.6%) [44] | 10 (41.7%) [13] | 2 (9.1%) [3]  |
| <b>Any mild PEAE</b>                       | NGT                    | 21 (87.5%) [84] | 1 (4.0%) [3]    | 0             |
|                                            | PDM                    | 15 (88.2%) [51] | 8 (47.1%) 11]   | 3 (18.8%) [6] |
|                                            | T2DM                   | 14 (63.6%) [44] | 9 (37.5%) [12]  | 2 (9.1%) [3]  |
| <b>Any moderate PEAE*</b>                  | NGT                    | 1 (4.2%) [1]    | 0               | 0             |
|                                            | PDM                    | 0               | 0               | 0             |
|                                            | T2DM                   | 0               | 1 (4.2%) [1]    | 0             |
| <b>Any severe PEAE</b>                     | <b>All Populations</b> | 0               | 0               | 0             |
| <b>PEAE related to procedure (PI call)</b> | NGT                    | 21 (87.5%) [78] | 1 (4.0%) [3]    | 0             |
|                                            | PDM                    | 15 (88.2%) [51] | 8 (47.1%) 11]   | 3 (18.8%) [6] |
|                                            | T2DM                   | 14 (63.6%) [43] | 7 (29.2%) [10]  | 1 (4.5%) [1]  |

PEAE= Procedure emergent adverse event

\*Both moderate adverse events were classed as headaches

Values reflect # subjects with event (per cent of subjects with event) [total # of events]

SUPPLEMENTARY DATA

**Supplementary Table 1.2.** Selected and Specific Procedure Emergent Adverse Events: All Mild

| PEAE                        | Population | AST             | MMTT          | FSIGT         |
|-----------------------------|------------|-----------------|---------------|---------------|
| <b>Dizziness</b>            | NGT        | 1 (4.2%) [1]    | 0             | 0             |
|                             | PDM        | 0               | 0             | 1 (6.3%) [2]  |
|                             | T2DM       | 3 (13.6%) [5]   | 0             | 0             |
| <b>Paresthesia (Oral)</b>   | NGT        | 11 (45.8%) [21] | 0             | 0             |
|                             | PDM        | 5 (29.4%) [9]   | 2 (11.8%) [3] | 0             |
|                             | T2DM       | 0               | 0             | 0             |
| <b>Paresthesia (Distal)</b> | NGT        | 2 (8.3%) [2]    | 0             | 0             |
|                             | PDM        | 5 (29.4%) [9]   | 0             | 0             |
|                             | T2DM       | 3 (13.6%) [7]   | 2 (8.3%) [2]  | 0             |
| <b>Dysgeusia</b>            | NGT        | 11 (45.8%) [20] | 1 (4.0%) [1]  | 0             |
|                             | PDM        | 9 (52.9%) [24]  | 2 (11.8%) [2] | 2 (12.5%) [2] |
|                             | T2DM       | 11 (50.0%) [26] | 5 (20.8%) [7] | 0             |
| <b>Flushing</b>             | NGT        | 8 (33.3%) [15]  | 1 (4.0%) [1]  | 0             |
|                             | PDM        | 2 (11.8%) [2]   | 0             | 0             |
|                             | T2DM       | 2 (9.1%) [2]    | 1 (4.2%) [1]  | 0             |

Values reflect # subjects with event (per cent of subjects with event) [total # of events]

SUPPLEMENTARY DATA

**Supplementary Table 2.1. Raw Analyte Data for MMTT**

| MMTT: Mean ± SEM Baseline and Maximum Observed Post Meal |               |    |                  |                  |                 |                 |
|----------------------------------------------------------|---------------|----|------------------|------------------|-----------------|-----------------|
| Analyte                                                  | GT Population | N  | Baseline Visit 1 | Baseline Visit 2 | Maximum Visit 1 | Maximum Visit 2 |
| Glucose (mg/dL)                                          | NGT           | 23 | 95.6 ± 1.16      | 94 ± 1.23        | 134 ± 1.99      | 135.7 ± 1.91    |
|                                                          | PDM           | 17 | 109.7 ± 2.92     | 109.3 ± 2.30     | 163.8 ± 6.50    | 160.8 ± 5.00    |
|                                                          | T2DM          | 22 | 157.4 ± 5.16     | 156.7 ± 5.84     | 253.4 ± 6.60    | 256.9 ± 7.46    |
| Insulin (µU/mL)                                          | NGT           | 23 | 11.8 ± 1.03      | 10.8 ± 1.00      | 137.9 ± 21.42   | 130.9 ± 16.58   |
|                                                          | PDM           | 17 | 22.0 ± 2.72      | 22.3 ± 2.58      | 210.6 ± 28.69   | 198.6 ± 20.98   |
|                                                          | T2DM          | 22 | 14.1 ± 1.91      | 14.2 ± 1.76      | 57.5 ± 8.16     | 59.8 ± 9.12     |
| C-Peptide (nmol/L)                                       | NGT           | 23 | 0.85 ± 0.037     | 0.82 ± 0.035     | 3.21 ± 0.192    | 3.25 ± 0.179    |
|                                                          | PDM           | 17 | 1.27 ± 0.093     | 1.32 ± 0.087     | 4.25 ± 0.338    | 4.33 ± 0.248    |
|                                                          | T2DM          | 22 | 1.02 ± 0.068     | 1.04 ± 0.066     | 2.21 ± 0.161    | 2.28 ± 0.183    |

SUPPLEMENTARY DATA

**Supplementary Table 2.2.** Derived Non-Compartmental Total AUC (0-4h) from Raw Analyte Data for MMTT, Geometric Means (95% CI), Geometric CVs (between and with) and ICCs

| Stimulation Test Parameter                       | Population (N) | Model Predicted Geometric Mean (95% CI) | Geometric CV% Between Subjects (90% CI) | Geometric CV% Within Subjects (90% CI) | ICC (90% CI)         |
|--------------------------------------------------|----------------|-----------------------------------------|-----------------------------------------|----------------------------------------|----------------------|
| MMTT: Glucose Total AUC(0-4h) (mg X min / dL)    | NGT (N=23)     | 26165 (24905, 27489)                    | 4 (2.4, 6.6)                            | 5.1 (4, 6.4)                           | 0.385 (0.395, 0.719) |
|                                                  | PDM (N=17)     | 30044 (28534, 31633)                    | 9.6 (6.9, 13.3)                         | 3.7 (2.8, 4.9)                         | 0.869 (0.837, 0.95)  |
|                                                  | T2DM (N=22)    | 53400 (50817, 56133)                    | 12.5 (9.1, 17.1)                        | 7.5 (5.9, 9.7)                         | 0.731 (0.621, 0.91)  |
| MMTT: Insulin Total AUC(0-4h) (μU X min / mL)    | NGT (N=23)     | 12491 (9887, 15781)                     | 42.9 (32, 58.2)                         | 16.1 (12.6, 20.6)                      | 0.868 (0.792, 0.946) |
|                                                  | PDM (N=17)     | 22548 (17663, 28783)                    | 42.1 (28.9, 62.7)                       | 23.9 (17.9, 32.1)                      | 0.746 (0.639, 0.898) |
|                                                  | T2DM (N=22)    | 9028 (7139, 11416)                      | 52.9 (39.3, 72.6)                       | 13.7 (10.7, 17.7)                      | 0.93 (0.907, 0.973)  |
| MMTT: C-Peptide Total AUC(0-4h) (nmol X min / L) | NGT (N=23)     | 528 (463, 601)                          | 19.5 (14.4, 26.3)                       | 10.7 (8.4, 13.6)                       | 0.767 (0.738, 0.903) |
|                                                  | PDM (N=17)     | 714 (622, 818)                          | 23.8 (16.9, 33.8)                       | 11.4 (8.6, 15.1)                       | 0.81 (0.698, 0.943)  |
|                                                  | T2DM (N=22)    | 441 (386, 502)                          | 29.5 (22.3, 39.3)                       | 8.1 (6.3, 10.4)                        | 0.927 (0.893, 0.972) |

SUPPLEMENTARY DATA

**Supplementary Table 2.3.** Raw Analyte Data for AST

| AST: Mean ± SEM Baseline and Maximum Observed Post Arginine Injection<br>at Basal and Elevated Glucose |               |    |                  |                  |                 |                 |
|--------------------------------------------------------------------------------------------------------|---------------|----|------------------|------------------|-----------------|-----------------|
| Analyte                                                                                                | GT Population | N  | Baseline Visit 1 | Baseline Visit 2 | Maximum Visit 1 | Maximum Visit 2 |
| Glucose (mg/dL)<br>At Basal Glucose                                                                    | NGT           | 23 | 93.1 ± 1.06      | 92.8 ± 1.01      | 105.2 ± 1.75    | 104.8 ± 1.32    |
|                                                                                                        | PDM           | 16 | 109.8 ± 2.64     | 107.9 ± 2.17     | 118.9 ± 2.75    | 117.2 ± 2.43    |
|                                                                                                        | T2DM          | 22 | 156.6 ± 5.48     | 154.9 ± 5.34     | 165.1 ± 5.29    | 163.7 ± 5.29    |
| Glucose (mg/dL)<br>At Elevated<br>Glucose                                                              | NGT           | 23 | 267.7 ± 6.17     | 263 ± 5.95       | 300.5 ± 7.52    | 292.3 ± 7.08    |
|                                                                                                        | PDM           | 16 | 281.9 ± 6.1      | 276.6 ± 6.74     | 315.9 ± 7.11    | 309.2 ± 8.00    |
|                                                                                                        | T2DM          | 22 | 328.7 ± 7.25     | 328.8 ± 6.81     | 372.9 ± 8.45    | 371.8 ± 8.67    |
| Insulin (µU/mL)<br>At Basal Glucose                                                                    | NGT           | 23 | 10.6 ± 0.84      | 9.7 ± 0.65       | 116.6 ± 9.40    | 116.8 ± 9.32    |
|                                                                                                        | PDM           | 16 | 22.8 ± 2.50      | 21.2 ± 2.52      | 146.5 ± 15.83   | 142.7 ± 14.50   |
|                                                                                                        | T2DM          | 22 | 13.9 ± 1.52      | 14 ± 1.90        | 61.9 ± 6.43     | 64.8 ± 8.73     |
| Insulin (µU/mL)<br>At Elevated<br>Glucose                                                              | NGT           | 23 | 76.0 ± 1.070     | 71.5 ± 11.21     | 597.0 ± 0.07    | 549.3 ± 67.83   |
|                                                                                                        | PDM           | 16 | 86.8 ± 7.59      | 80.4 ± 7.69      | 535.7 ± 44.04   | 529.6 ± 48.43   |
|                                                                                                        | T2DM          | 22 | 26 ± 3.46        | 23.8 ± 3.30      | 133.1 ± 16.68   | 131.4 ± 17.24   |
| C-Peptide (nmol/L)<br>At Basal Glucose                                                                 | NGT           | 23 | 0.79 ± 0.035     | 0.76 ± 0.029     | 2.44 ± 0.141    | 2.43 ± 0.128    |
|                                                                                                        | PDM           | 16 | 1.34 ± 0.08      | 1.29 ± 0.09      | 2.96 ± 0.205    | 2.99 ± 0.24     |
|                                                                                                        | T2DM          | 22 | 1.05 ± 0.06      | 1.05 ± 0.068     | 1.8 ± 0.113     | 1.83 ± 0.14     |
| Cpeptide (nmol/L)<br>At Elevated<br>Glucose                                                            | NGT           | 23 | 2.70 ± 0.173     | 2.58 ± 0.178     | 8.13 ± 0.591    | 7.63 ± 0.600    |
|                                                                                                        | PDM           | 16 | 2.85 ± 0.134     | 2.74 ± 0.141     | 7.51 ± 0.453    | 7.42 ± 0.489    |
|                                                                                                        | T2DM          | 22 | 1.39 ± 0.104     | 1.36 ± 0.104     | 2.89 ± 0.235    | 2.91 ± 0.236    |

SUPPLEMENTARY DATA

**Supplementary Table 2.4.** Raw Analyte Data for FSIGT

| FSIGT: Mean ± SEM Baseline and Maximum Observed (0 to 19 minutes) Post Glucose Injection<br>Insulin at 22 minutes Post Insulin Injection |               |    |                  |                 |                               |
|------------------------------------------------------------------------------------------------------------------------------------------|---------------|----|------------------|-----------------|-------------------------------|
| Analyte                                                                                                                                  | GT Population | N  | Baseline Visit 3 | Maximum Visit 3 | Insulin AT 22 Minutes Visit 3 |
| Glucose (mg/dL)                                                                                                                          | NGT           | 23 | 95.7 ± 1.29      | 370.6 ± 11.91   |                               |
|                                                                                                                                          | PDM           | 16 | 110.2 ± 2.65     | 396.2 ± 13.67   |                               |
|                                                                                                                                          | T2DM          | 22 | 156.3 ± 6.72     | 437.4 ± 8.49    |                               |
| Insulin (µU/mL)                                                                                                                          | NGT           | 23 | 11.3 ± 1.02      | 147.0 ± 22.00   | 447.9 ± 18.14                 |
|                                                                                                                                          | PDM           | 16 | 22.0 ± 2.59      | 109.5 ± 15.47   | 554.5 ± 25.35                 |
|                                                                                                                                          | T2DM          | 22 | 14.7 ± 1.81      | 24.1 ± 3.22     | 430.9 ± 15.10                 |
| C-Peptide (nmol/L)                                                                                                                       | NGT           | 23 | 0.83 ± 0.035     | 2.90 ± 0.241    |                               |
|                                                                                                                                          | PDM           | 16 | 1.29 ± 0.086     | 2.66 ± 0.217    |                               |
|                                                                                                                                          | T2DM          | 22 | 1.01 ± 0.065     | 1.23 ± 0.094    |                               |
